# Supplementary material for: Effect of Endothelial Microparticles Induced by Hypoxia on Migration and Angiogenesis of Human Umbilical Vein Endothelial Cells by Delivering MicroRNA-19b
Source: PubMed Central journal article supplement — Chin Med J (Engl). 2018 Nov 20;131(22):2726–33. doi: 10.4103/0366-6999.245271 (PMC6247585; doi:10.4103/0366-6999.245271), 2018-11-20
Supplement: CMJ-131-2726_Suppl1.pdf [file CMJ-131-2726_Suppl1.pdf]

## SUPPLEMENTARY DATA

### CELL CULTURE

Human umbilical vein endothelial cells (HUVECs) were cultured from the umbilical cord which was separated from the placenta. The blood in the umbilical vein was washed away using  $1 \times$  HEPES solution. 0.1% collagenase type I (Sigma, USA) was subsequently infused into the umbilical vein, which was digested for 15 min at 37°C. The solution containing the endothelial cells was rinsed with an appropriate amount of  $1 \times$  HEPES solution. This entire operation was performed with sterile techniques and was completed within 3 h. The cells obtained from the solution were cultured in an endothelial cell medium (ECM, ScienCell, USA) supplemented with 5% fetal bovine serum (FBS), 100 U/ml penicillin, 100 mg/ml streptomycin, and 1% endothelial cell growth supplement (ScienCell, USA) at 37°C in a humidified atmosphere with 5% CO<sub>2</sub> and 95% O<sub>2</sub>. Culture medium was refreshed every 2–3 days. HUVEC passages from three to six were used for this study.

### ENDOTHELIAL MICROPARTICLE ISOLATION

Endothelial microparticles (EMPs) were isolated from cell culture medium by sequential centrifugation. First, medium of HUVECs was centrifuged at  $800 \times g$  for 15 min and 12,500 g for 5 min at 4°C to remove cell debris and apoptotic bodies (1–5 µm), and the microparticle-enriched medium was collected. Second, the supernatant was further centrifuged at 4°C at 20,500 g for 2.5 h to pellet down MPs smaller than 1 µm.

### ELECTRON MICROSCOPY

EMPs isolated from the supernatant of HUVECs were adsorbed onto formvar /carbon-coated copper mesh grids, rinsed in filtered phosphate-buffered saline (PBS), and then fixed in 1% glutaraldehyde at 4°C for 1 h and stained with 1% uranyl acetate for 10 min. All transmission electron micrographs were obtained using transmission electron microscope (FEI Tecnai Spirit) at 120 kV.

### FLOW CYTOMETRY

The number of EMPs was analyzed on a flow cytometer (BD, USA). The EMP concentration was assessed by comparison to TruCount beads added to each sample. The EMP gate was defined as particles from 0.1 to 1 µm in size using calibration beads (Invitrogen). The presence of phosphatidylserine at the surface of MPs was assessed using FITC-conjugated Annexin V (Miltenyi). To identify the EMPs (Annexin V+CD31), EMPs were stained with anti-CD31-phycoerythrin. Annexin V-FITC with EDTA and isotype-matched antibodies served as negative controls.

### MIGRATION ASSAY AND TUBE FORMATION ASSAY

For scratch migration assay, A 200 µl pipette tip was used to create a scratch on cell monolayer. The plate was washed once with PBS followed by replacement of ECM. After incubation at 37°C, 5% CO<sub>2</sub> for 12 h, migration was quantified by measuring the cell-free area.

For transwell chamber migration assays,  $5 \times 10^4$  cells which were suspended in 600 µl serum free and plated onto a gelatin-coated 8.0 µm pore size polycarbonate membrane in 24-well plates (Corning, NY). The lower chamber contained ECM with 10% FBS and 20 ng/ml vascular endothelial growth factor. After incubation at 37°C, 5% CO<sub>2</sub> for 18 h, the lower chambers were washed with PBS, and cells were fixed with 4% paraformaldehyde, followed by 0.1% crystal violet staining. The migrated cells were photographed for counting.

For tube formation assay, 200 µl Matrigel matrix (BD Biosciences, USA) was added to 48-well plates and the gel was formed at 37°C in 5% CO<sub>2</sub>. Following gel solidification for 30 min, 50 µl of HUVEC suspension ( $4 \times 10^5$ /ml) was added to each well and the cell culture medium was compensated to 1 ml. Tube formation was observed using an inverted microscope, and the average percentage of tube number of tube-like capillary measured in random 10 photographic fields (% control) was described to evaluate the activity.

### REAL-TIME POLYMERASE CHAIN REACTION

For quantification of miRNAs, TaqMan MicroRNA Reverse Transcription Kit and miRNA-specific stem-loop primers (Applied Biosystems, USA) were used. Real-time polymerase chain reaction (RT-PCR) reactions were preincubated at 95°C for 10 min, followed by 40 cycles of 95°C for 15 s and 60°C for 60 s. MiR-19b levels in HUVECs were normalized to U6 snRNA or RNU6B. Values in EMPs were normalized to the spiked-in *Caenorhabditis elegans* miRNAs, cel-miR-39 (10 fmol/sample; Qiagen, Inc.).

For transcript relative quantification, ImProm-IITM Transcription System and GoTaq 2-Step RT-quantitative PCR System (Promega, USA) were used. RT-PCR was performed using the primers of transforming growth factor- $\beta$ 2 (*TGF $\beta$ 2*, 5'-AAATGGAGGCCAGAAAGAT-3'; 5'-ACTTGACTGCACCGTTGTTG-3') and glyceraldehyde-3-phosphate dehydrogenase (GAPDH, 5'-GAGTCAACGGATTTGGTCGT-3'; 5'-GACAAGCTTCCCGTTCTCAG-3'). Amplifications were preincubated at 95°C for 10 min, followed by 40 cycles of 94°C for 30 s, 60°C for 30 s, and 72°C for 30 s. Values were normalized to GAPDH.

## WESTERN BLOT ANALYSIS

HUVECs were lysed in a RIPA lysis buffer (50 mM Tris HCl pH 7.4, 1% NP-40, 0.25% sodium deoxycholate, 150 mM NaCl, 1 mM EDTA, 1.2% Triton-X-114, 1 mM NaF, 200 mM NaVO<sub>4</sub>) with protease inhibitor (Roche Diagnostics) and centrifuged at 12,000 g for 10 min at 4°C. The supernatants were collected, and the protein concentration was determined with the bicinchoninic acid protein assay kit (Pierce Biotechnology Inc., USA). 20–30  $\mu$ g proteins were separated by 10% sodium dodecyl sulfate-polyacrylamide gel and electrophoretically transferred to PVDF membranes (Millipore, USA). The membranes were probed against TGF $\beta$ 2 (Abcam, USA) and reprobed against GAPDH (Santa Cruz Biotechnology, USA) as a loading control.

## LUCIFERASE PLASMID CONSTRUCT

The human *TGF $\beta$ 2* 3'UTR segment was obtained by PCR amplification. Primer pairs were designed to amplify a segment of 1306 bp, which contained the predicted miR-19b target site within the *TGF $\beta$ 2* 3'UTR (*TGF $\beta$ 2*-WT-F: 5'-GACTAGTAATGGAATATTTGCAGTTTCACCT-3' and *TGF $\beta$ 2*-WT-R: 5'-ATGGTACTGATAGGAAAAGACATCCACATAT-3'). PCR products were ligated into the multiple cloning site of the luciferase reporter plasmid pMIR-REPORT™ (Applied Biosystems, USA) digested by SacI and PmeI. The correct orientation of the insert was determined by sequencing. To generate mutations in the predicted target site of miR-19b, seven nucleotides located in the seed region of miR-19b were mutated through PCR amplification (*TGF $\beta$ 2*-MUT-F: 5'-AGAGAGATGAAACGTGCATGCTTTGGCTTTCT GGTTCTA-3' and *TGF $\beta$ 2*-MUT-R: 5'-AAAGCATGCACGTTTCATCTCTCTGCATTTTTTC TGGTCGGC-3'). Sequencing was performed to verify the mutations of the seven nucleotides.
